# Supplementary material
Source: PubMed Central journal article supplement (PMC3196085)
Supplement: supp_M111.279679_jbc.M111.279679-1.pdf [file supp_M111.279679_jbc.M111.279679-1.pdf]

### BMP10 Transgenic Mouse Heart Exon Array

| Gene Symbol | RefSeq       | p-value(Group) | Ratio(TG vs. NTG) |
|-------------|--------------|----------------|-------------------|
| Tbx20       | NM_194263    | 7.00E-10       | 2.19865           |
| Myoc        | NM_010865    | 7.16E-10       | 9.87936           |
| Bmp10       | NM_009756    | 1.12E-09       | 4.77437           |
| Reln        | NM_011261    | 1.45E-09       | 0.349945          |
| Tiam1       | NM_009384    | 1.74E-09       | 1.84608           |
| Soat1       | NM_009230    | 2.57E-09       | 2.58464           |
| Smad6       | NM_008542    | 3.24E-09       | 3.04348           |
| Vtn         | NM_011707    | 7.13E-09       | 0.21829           |
| Egflam      | NM_178748    | 1.58E-08       | 0.504658          |
| Pcolce2     | NM_029620    | 2.54E-08       | 1.61137           |
| Thy1        | NM_009382    | 3.01E-08       | 0.59449           |
| Gfra1       | NM_010279    | 3.28E-08       | 0.411243          |
| Cd207       | NM_144943    | 3.57E-08       | 6.2893            |
| Fbln5       | NM_011812    | 5.25E-08       | 1.83793           |
| Igfbp3      | NM_008343    | 6.33E-08       | 2.86632           |
| Aqp1        | NM_007472    | 7.65E-08       | 0.295609          |
| Gria4       | NM_019691    | 8.85E-08       | 2.24855           |
| Angpt17     | NM_001039554 | 9.11E-08       | 3.3136            |
| Pdgfra      | NM_011058    | 9.46E-08       | 1.3937            |
| Foxp2       | NM_053242    | 1.00E-07       | 1.51901           |
| Gpc6        | NM_001079844 | 1.07E-07       | 1.64493           |
| Asah3l      | NM_139306    | 1.14E-07       | 2.06721           |
| Cmah        | NM_001111110 | 1.22E-07       | 0.440216          |
| Eya4        | NM_010167    | 1.47E-07       | 2.40167           |
| Grhl1       | NM_145890    | 1.58E-07       | 3.08037           |
| Vsig4       | NM_177789    | 1.88E-07       | 9.53025           |
| Itgal       | NM_008400    | 1.96E-07       | 2.2897            |
| Rasa4       | NM_133914    | 2.06E-07       | 0.615245          |
| Pdlim2      | NM_145978    | 2.09E-07       | 1.33415           |
| Hmcn2       | BC034076     | 2.94E-07       | 0.370142          |
| Cfi         | NM_007686    | 3.02E-07       | 2.12252           |
| Sulf2       | NM_028072    | 3.32E-07       | 1.34042           |
| Gabra3      | NM_008067    | 3.54E-07       | 2.70941           |
| Fgfr2       | NM_010207    | 3.63E-07       | 2.32834           |
| Slco2a1     | NM_033314    | 3.64E-07       | 2.40725           |
| Mgl2        | NM_145137    | 3.81E-07       | 0.174718          |
| Sorbs3      | NM_011366    | 4.29E-07       | 1.70267           |
| Mgl1        | NM_010796    | 5.01E-07       | 0.31866           |
| Ltc4s       | NM_008521    | 5.49E-07       | 0.583303          |
| Cd74        | NM_001042605 | 5.54E-07       | 0.657403          |
| Mctp1       | NM_030174    | 5.69E-07       | 3.55776           |
| Sfrp2       | NM_009144    | 5.74E-07       | 3.2455            |
| Tg          | NM_009375    | 5.86E-07       | 0.728794          |
| Pde8b       | NM_172263    | 5.87E-07       | 0.414054          |

|            |                   |          |          |
|------------|-------------------|----------|----------|
| Ecm1       | NM_007899         | 6.42E-07 | 1.95877  |
| Timp4      | NM_080639         | 6.86E-07 | 0.286355 |
| Fap        | NM_007986         | 6.96E-07 | 0.387251 |
| Prkab1     | NM_031869         | 6.99E-07 | 0.733269 |
| Grpel1     | NM_024478         | 7.50E-07 | 0.798906 |
| Atoh8      | NM_153778         | 7.60E-07 | 1.9744   |
| Ctss       | NM_021281         | 7.67E-07 | 1.76904  |
| Tmem45a    | NM_019631         | 7.87E-07 | 2.13852  |
| Smad7      | NM_001042660      | 8.75E-07 | 2.47002  |
| Csf1r      | NM_001037859      | 8.99E-07 | 1.57576  |
| Astn2      | NM_207109         | 9.18E-07 | 1.75435  |
| Fbln1      | NM_010180         | 9.81E-07 | 1.47449  |
| Slco2b1    | NM_175316         | 1.06E-06 | 0.583964 |
| Arrb1      | NM_177231         | 1.13E-06 | 1.3826   |
| Scara3     | NM_172604         | 1.21E-06 | 1.50471  |
| Necab1     | NM_178617         | 1.33E-06 | 0.413973 |
| Slc16a2    | NM_009197         | 1.46E-06 | 1.87776  |
| Gli1       | NM_010296         | 1.50E-06 | 1.5696   |
| Rtp3       | ENSMUST0000084922 | 1.52E-06 | 0.735211 |
| Shmt1      | NM_009171         | 1.53E-06 | 0.616465 |
| Peg3       | NM_008817         | 1.61E-06 | 1.88714  |
| Timm44     | NM_011592         | 1.69E-06 | 0.802402 |
| Cmpk2      | NM_020557         | 1.74E-06 | 0.642522 |
| Chrn1      | NM_009601         | 1.75E-06 | 0.592183 |
| Mrpl2      | NM_025302         | 1.78E-06 | 0.795512 |
| Tmod4      | NM_016712         | 1.85E-06 | 0.428164 |
| Megf10     | NM_001001979      | 1.85E-06 | 1.59575  |
| Lhfp       | NM_175386         | 1.86E-06 | 1.48528  |
| Polq       | NM_029977         | 1.86E-06 | 0.603965 |
| Unc5b      | NM_029770         | 1.91E-06 | 2.18266  |
| Angpt1     | NM_009640         | 1.96E-06 | 0.356606 |
| Pdlim3     | NM_016798         | 2.03E-06 | 1.93039  |
| Nrxn1      | NM_020252         | 2.12E-06 | 2.61603  |
| Zcchc5     | NM_199468         | 2.29E-06 | 2.65201  |
| Oas2       | NM_145227         | 2.30E-06 | 0.675954 |
| Slc24a5    | NM_175034         | 2.33E-06 | 0.522592 |
| Rasgrp2    | NM_011242         | 2.34E-06 | 0.697388 |
| Slc16a12   | NM_172838         | 2.38E-06 | 0.490536 |
| Kank3      | NM_030697         | 2.48E-06 | 0.753548 |
| Gfra3      | NM_010280         | 2.51E-06 | 0.746333 |
| D10Ert641e | BC025117          | 2.57E-06 | 0.727947 |
| Plekhh2    | NM_177606         | 2.60E-06 | 1.49247  |
| Podxl      | NM_013723         | 2.71E-06 | 0.768196 |
| Vim        | NM_011701         | 2.84E-06 | 1.27332  |
| Sgk1       | NM_011361         | 2.87E-06 | 1.71181  |
| Pole2      | NM_011133         | 2.88E-06 | 1.37295  |
| Ccdc80     | NM_026439         | 2.90E-06 | 1.54521  |

|               |                    |          |          |
|---------------|--------------------|----------|----------|
| Scara5        | NM_028903          | 2.97E-06 | 0.493358 |
| Ret           | NM_001080780       | 3.04E-06 | 0.504718 |
| Adcyap1r1     | NM_007407          | 3.15E-06 | 0.684799 |
| Myrip         | NM_144557          | 3.22E-06 | 1.54039  |
| Vipr2         | NM_009511          | 3.24E-06 | 0.592988 |
| C1qtnf9       | NM_183175          | 3.35E-06 | 0.385391 |
| Gnb3          | NM_013530          | 3.41E-06 | 0.569434 |
| Bmper         | NM_028472          | 3.60E-06 | 0.650828 |
| Sh3rf2        | NM_172966          | 3.62E-06 | 0.455055 |
| Otoa          | NM_139310          | 3.62E-06 | 1.61188  |
| D630003M21Rik | BC137959           | 3.62E-06 | 0.663884 |
| Car4          | NM_007607          | 3.90E-06 | 0.434262 |
| Rasgef1b      | NM_145839          | 3.95E-06 | 2.14768  |
| Trf           | NM_133977          | 4.01E-06 | 1.44049  |
| Slc9a7        | NM_177353          | 4.08E-06 | 1.61185  |
| Smad9         | NM_019483          | 4.20E-06 | 2.79687  |
| Csf2rb        | NM_007780          | 4.28E-06 | 1.47835  |
| Eng           | NM_007932          | 4.50E-06 | 1.39023  |
| Igfbp4        | NM_010517          | 4.68E-06 | 1.45264  |
| Dkk3          | NM_015814          | 4.77E-06 | 1.75968  |
| Ldhd          | NM_027570          | 4.92E-06 | 0.684054 |
| Tec           | NM_001113460       | 4.95E-06 | 1.42322  |
| Wdr41         | NM_172590          | 4.97E-06 | 0.846748 |
| Ephb1         | NM_173447          | 4.98E-06 | 0.442777 |
| Hey1          | NM_010423          | 5.04E-06 | 1.61668  |
| Tmem215       | ENSMUST00000049655 | 5.08E-06 | 1.59029  |
| Rbms3         | NM_178660          | 5.14E-06 | 1.52717  |
| Tmem141       | NM_001109993       | 5.38E-06 | 0.663316 |
| Gpr39         | BC085285           | 5.61E-06 | 2.2322   |
| Acvr1         | NM_001110204       | 5.62E-06 | 1.34034  |
| Ptpn13        | NM_011204          | 5.69E-06 | 1.46419  |
| Sirpa         | NM_007547          | 6.14E-06 | 1.32692  |
| Grhl3         | NM_001013756       | 6.15E-06 | 1.52677  |
| Vwf           | NM_011708          | 6.22E-06 | 1.63973  |
| Cdkn1c        | NM_009876          | 6.25E-06 | 0.64465  |
| Retnla        | NM_020509          | 6.30E-06 | 0.180073 |
| Cachd1        | NM_198037          | 6.37E-06 | 1.31456  |
| Trhde         | NM_146241          | 6.78E-06 | 0.435383 |
| L1cam         | NM_008478          | 7.05E-06 | 0.708419 |
| Lect1         | NM_010701          | 7.08E-06 | 2.17339  |
| Gng8          | NM_010320          | 7.08E-06 | 2.57778  |
| Cisd1         | NM_134007          | 7.13E-06 | 0.804443 |
| Adra1a        | NM_013461          | 7.30E-06 | 0.367949 |
| Bicc1         | NM_031397          | 7.52E-06 | 1.42044  |
| Il13ra1       | NM_133990          | 7.61E-06 | 1.39565  |
| Eif2b4        | NM_001127356       | 7.66E-06 | 0.778846 |
| Wnt2          | NM_023653          | 7.74E-06 | 1.55701  |

|               |              |          |          |
|---------------|--------------|----------|----------|
| Aass          | NM_013930    | 7.83E-06 | 1.72503  |
| Dpysl2        | NM_009955    | 7.97E-06 | 1.18096  |
| Tmem164       | NM_177592    | 8.00E-06 | 1.3598   |
| Unc5c         | NM_009472    | 8.14E-06 | 1.76452  |
| Adam23        | NM_011780    | 8.19E-06 | 2.0818   |
| Pccb          | NM_025835    | 8.32E-06 | 0.844786 |
| Usp52         | NM_133992    | 8.50E-06 | 1.14068  |
| Trpc3         | NM_019510    | 8.54E-06 | 0.569954 |
| Nln           | NM_029447    | 8.73E-06 | 0.82913  |
| Setd8         | NM_030241    | 8.73E-06 | 0.792268 |
| Als2cr13      | NM_001037725 | 8.87E-06 | 1.36248  |
| Nrg1          | NM_178591    | 8.97E-06 | 0.530139 |
| Gnao1         | NM_010308    | 9.25E-06 | 1.64681  |
| Wwc2          | NM_133791    | 9.27E-06 | 1.21226  |
| Sulf1         | NM_172294    | 9.40E-06 | 1.59063  |
| Dsc2          | NM_013505    | 9.51E-06 | 0.746777 |
| Ncam1         | NM_001113204 | 9.56E-06 | 1.59002  |
| Bckdha        | NM_007533    | 1.02E-05 | 0.695832 |
| Slc7a8        | NM_016972    | 1.04E-05 | 1.7067   |
| Ap1b1         | NM_007454    | 1.05E-05 | 0.846563 |
| Mrpl28        | NM_024227    | 1.05E-05 | 0.69632  |
| Pdk3          | NM_145630    | 1.07E-05 | 1.39208  |
| Coq9          | NM_026452    | 1.07E-05 | 0.760269 |
| Pde1a         | NM_016744    | 1.09E-05 | 1.4442   |
| Tcf21         | NM_011545    | 1.09E-05 | 2.51448  |
| Mccc2         | NM_030026    | 1.11E-05 | 0.689166 |
| Cd33          | NM_001111058 | 1.13E-05 | 0.620997 |
| Slc15a3       | NM_023044    | 1.15E-05 | 1.48687  |
| B3galt1       | NM_020283    | 1.16E-05 | 1.86465  |
| ApoE          | NM_009696    | 1.18E-05 | 1.43825  |
| Ust           | NM_177387    | 1.19E-05 | 1.41254  |
| Ccdc88c       | NM_026681    | 1.21E-05 | 0.756497 |
| Opcml         | NM_177906    | 1.23E-05 | 0.51143  |
| Fgf16         | NM_030614    | 1.27E-05 | 0.405646 |
| Nat11         | BC020020     | 1.28E-05 | 0.821261 |
| Ifi44         | NM_133871    | 1.28E-05 | 0.488402 |
| Asrgl1        | NM_025610    | 1.28E-05 | 1.36625  |
| Prdx5         | NM_012021    | 1.32E-05 | 0.759227 |
| Scn10a        | NM_009134    | 1.33E-05 | 0.756288 |
| Foxred1       | NM_172291    | 1.35E-05 | 0.737077 |
| Mrpl14        | NM_026732    | 1.38E-05 | 0.659683 |
| Pla2g2d       | NM_011109    | 1.41E-05 | 0.278399 |
| Arhgap24      | NM_029270    | 1.42E-05 | 0.654265 |
| 5430416O09Rik | BC147345     | 1.44E-05 | 0.650812 |
| Cxcl13        | NM_018866    | 1.47E-05 | 5.57003  |
| Yap1          | NM_009534    | 1.48E-05 | 1.29147  |
| Tnfrsf2       | NM_009396    | 1.53E-05 | 0.645883 |

|               |           |          |          |
|---------------|-----------|----------|----------|
| Col14a1       | NM_181277 | 1.56E-05 | 1.8205   |
| Comp          | NM_016685 | 1.56E-05 | 2.22661  |
| Skil          | NM_011386 | 1.57E-05 | 1.74146  |
| Reps2         | NM_178256 | 1.61E-05 | 0.612389 |
| Siglece       | NM_031181 | 1.63E-05 | 1.47237  |
| Meig1         | NM_008579 | 1.64E-05 | 0.642331 |
| Dgat2         | NM_026384 | 1.65E-05 | 0.607984 |
| Efna5         | NM_207654 | 1.67E-05 | 1.43111  |
| Hip1          | NM_146001 | 1.68E-05 | 1.29747  |
| Epb4.1l4a     | NM_013512 | 1.71E-05 | 0.780595 |
| Pxmp4         | NM_021534 | 1.74E-05 | 0.69668  |
| Lmo4          | NM_010723 | 1.75E-05 | 1.3738   |
| 4732429D16Rik | NM_145437 | 1.76E-05 | 1.74531  |
| Fpr1          | NM_013521 | 1.77E-05 | 3.29085  |
| A230051G13Rik | BC094909  | 1.78E-05 | 0.733219 |
| Fbxw16        | NM_177070 | 1.81E-05 | 0.487071 |
| Gramd1b       | NM_172768 | 1.89E-05 | 0.592964 |
| Pacsin2       | NM_011862 | 1.96E-05 | 0.757123 |
| Vit           | NM_028813 | 1.97E-05 | 1.87938  |
| Enpp6         | NM_177304 | 2.00E-05 | 1.53015  |
| Ccl7          | NM_013654 | 2.00E-05 | 0.586065 |
| Sirt5         | NM_178848 | 2.02E-05 | 0.754437 |
| Efhd1         | NM_028889 | 2.04E-05 | 0.639747 |
| Hdc           | NM_008230 | 2.06E-05 | 1.36423  |
| Igsf1         | NM_177591 | 2.07E-05 | 1.7697   |
| Stxbp2        | NM_011503 | 2.08E-05 | 1.24317  |
| Als2cr2       | NM_172656 | 2.10E-05 | 0.785184 |
| Msr1          | NM_031195 | 2.15E-05 | 3.08931  |
| Svep1         | NM_022814 | 2.20E-05 | 2.04281  |
| Lpar3         | NM_022983 | 2.26E-05 | 1.83915  |
| Heph          | NM_010417 | 2.27E-05 | 1.43902  |
| 9430028L06Rik | BC147606  | 2.28E-05 | 2.47429  |
| Cpne5         | NM_153166 | 2.31E-05 | 1.80087  |
| Trpc6         | NM_013838 | 2.39E-05 | 1.49328  |
| Cdk8          | NM_153599 | 2.45E-05 | 1.54624  |
| Tspan13       | NM_025359 | 2.47E-05 | 0.765589 |
| Cyp1b1        | NM_009994 | 2.52E-05 | 2.17053  |
| Mtmr11        | NM_181409 | 2.59E-05 | 1.29993  |
| Dock7         | NM_026082 | 2.63E-05 | 1.20401  |
| Man2a1        | NM_008549 | 2.63E-05 | 1.38757  |
| Nnt           | NR_003544 | 2.68E-05 | 0.840319 |
| Cav2          | NM_016900 | 2.68E-05 | 0.726104 |
| Msh5          | NM_013600 | 2.78E-05 | 1.41621  |
| Rnf145        | NM_028862 | 2.82E-05 | 1.24921  |
| Sfrp1         | NM_013834 | 2.90E-05 | 1.65755  |
| Cd38          | NM_007646 | 2.90E-05 | 1.40742  |
| Psmb9         | NM_013585 | 2.94E-05 | 0.756586 |

|               |           |          |          |
|---------------|-----------|----------|----------|
| Hint2         | NM_026871 | 2.96E-05 | 0.719182 |
| Cabc1         | NM_023341 | 2.96E-05 | 0.760349 |
| Scd4          | NM_183216 | 2.99E-05 | 0.365292 |
| Arhgap6       | NM_009707 | 3.01E-05 | 1.4889   |
| Psme1         | NM_011189 | 3.02E-05 | 0.730093 |
| Has3          | NM_008217 | 3.04E-05 | 0.51402  |
| Nostrin       | NM_181547 | 3.04E-05 | 1.56228  |
| Sertad4       | NM_198247 | 3.07E-05 | 1.52642  |
| Obfc2a        | NM_028696 | 3.07E-05 | 0.673934 |
| Duoxa1        | NM_145395 | 3.10E-05 | 0.536285 |
| Chi3l1        | NM_007695 | 3.13E-05 | 2.02459  |
| Bmp5          | NM_007555 | 3.14E-05 | 0.599613 |
| Slc24a4       | NM_172152 | 3.19E-05 | 1.59331  |
| 1500032D16Rik | NM_030087 | 3.27E-05 | 0.788714 |
| Gsto1         | NM_010362 | 3.27E-05 | 0.681621 |
| Igtp          | NM_018738 | 3.28E-05 | 0.60473  |
| 6530404N21Rik | DQ788834  | 3.29E-05 | 0.829818 |
| Ict1          | NM_026729 | 3.38E-05 | 0.802013 |
| Itga4         | NM_010576 | 3.42E-05 | 1.38816  |
| Stat2         | NM_019963 | 3.43E-05 | 0.798654 |
| Dtd1          | NM_025314 | 3.46E-05 | 0.886605 |
| Bgn           | NM_007542 | 3.46E-05 | 1.45043  |
| Postn         | NM_015784 | 3.46E-05 | 2.62774  |
| Smarca1       | NM_053123 | 3.47E-05 | 1.54443  |
| Sox4          | NM_009238 | 3.47E-05 | 0.744459 |
| 3321401G04Rik | NM_029930 | 3.48E-05 | 1.22902  |
| Immp2l        | NM_053122 | 3.51E-05 | 0.798431 |
| Pde9a         | NM_008804 | 3.58E-05 | 0.871433 |
| Iqgap1        | NM_016721 | 3.70E-05 | 1.18362  |
| Ndufa9        | NM_025358 | 3.72E-05 | 0.825819 |
| Prelp         | NM_054077 | 3.76E-05 | 1.2024   |
| Actn1         | NM_134156 | 3.78E-05 | 1.43389  |
| Tnfrsf21      | NM_178589 | 3.80E-05 | 0.726315 |
| Gpd1l         | NM_175380 | 3.86E-05 | 0.700119 |
| Slc41a2       | NM_177388 | 3.86E-05 | 1.82395  |
| Timp3         | NM_011595 | 3.89E-05 | 1.23055  |
| Timm10        | NM_013899 | 3.93E-05 | 0.580915 |
| Ntf3          | NM_008742 | 4.00E-05 | 0.716578 |
| Dnajc11       | NM_172704 | 4.02E-05 | 0.824529 |
| Antxr1        | NM_054041 | 4.03E-05 | 1.27685  |
| Rgs6          | NM_015812 | 4.05E-05 | 1.54362  |
| Dcn           | NM_007833 | 4.06E-05 | 1.18946  |
| Ckm           | NM_007710 | 4.06E-05 | 0.830575 |
| Gpt           | NM_182805 | 4.09E-05 | 0.659453 |
| Ston1         | NM_029858 | 4.12E-05 | 1.38931  |
| Kcna2         | NM_008417 | 4.14E-05 | 0.831432 |
| Fdx1          | NM_007996 | 4.23E-05 | 0.723206 |

|               |              |          |          |
|---------------|--------------|----------|----------|
| Slitrk4       | NM_178740    | 4.30E-05 | 3.27189  |
| Ptpru         | NM_001083119 | 4.37E-05 | 1.29979  |
| Prkd1         | NM_008858    | 4.49E-05 | 0.816966 |
| Cyfp2         | NM_133769    | 4.52E-05 | 0.56718  |
| F2r           | NM_010169    | 4.54E-05 | 1.3542   |
| Apol10b       | NM_177820    | 4.56E-05 | 0.300125 |
| Kank1         | NM_181404    | 4.60E-05 | 1.18962  |
| S100a6        | NM_011313    | 4.65E-05 | 0.820816 |
| Cops6         | NM_012002    | 4.66E-05 | 0.88485  |
| Sdhd          | NM_025848    | 4.83E-05 | 0.833696 |
| BB146404      | NM_178908    | 4.83E-05 | 2.29515  |
| Slc3a2        | NM_008577    | 4.85E-05 | 1.29308  |
| 1110028A07Rik | NM_026808    | 4.95E-05 | 0.657781 |
| Rorc          | NM_011281    | 5.02E-05 | 0.696545 |
| Slc6a6        | NM_009320    | 5.06E-05 | 1.50053  |
| Cacna1g       | NM_009783    | 5.23E-05 | 2.14308  |
| Hap1          | NM_010404    | 5.27E-05 | 0.881083 |
| Wdr23         | NM_133734    | 5.31E-05 | 0.820576 |
| Id4           | NM_031166    | 5.32E-05 | 1.39674  |
| Tmem2         | NM_031997    | 5.38E-05 | 1.33402  |
| Timm50        | NM_025616    | 5.47E-05 | 0.806082 |
| 9130404D14Rik | BC027843     | 5.48E-05 | 1.37276  |
| 1110032E23Rik | NM_133187    | 5.48E-05 | 1.43137  |
| 2310076L09Rik | NM_001077348 | 5.60E-05 | 0.647843 |
| lvd           | NM_019826    | 5.60E-05 | 0.698511 |
| Mthfd1        | NM_138745    | 5.61E-05 | 0.836852 |
| Als2cl        | NM_146228    | 5.63E-05 | 0.786401 |
| Mrpl34        | NM_053162    | 5.66E-05 | 0.754156 |
| Kcnk2         | NM_010607    | 5.75E-05 | 0.517597 |
| Trpm3         | NM_001035240 | 5.84E-05 | 1.43748  |
| Olfml3        | NM_133859    | 5.93E-05 | 2.05907  |
| Gria3         | NM_016886    | 6.05E-05 | 1.61975  |
| Srgap3        | NM_080448    | 6.12E-05 | 1.49136  |
| 1700040L02Rik | BC087900     | 6.15E-05 | 0.596576 |
| Ahsg          | NM_013465    | 6.34E-05 | 1.79526  |
| Lphn1         | NM_181039    | 6.41E-05 | 1.28403  |
| Dtx3l         | NM_001013371 | 6.42E-05 | 0.802182 |
| 6330403K07Rik | NM_134022    | 6.53E-05 | 1.4869   |
| Agpat9        | NM_172715    | 6.56E-05 | 0.725566 |
| Tmem143       | NM_144801    | 6.57E-05 | 0.658554 |
| Pank4         | NM_172990    | 6.69E-05 | 0.818523 |
| Optn          | NM_181848    | 6.88E-05 | 0.727591 |
| Rab34         | NM_033475    | 6.90E-05 | 1.12813  |
| Gprc5b        | NM_022420    | 7.02E-05 | 1.3881   |
| Npal3         | NM_028995    | 7.03E-05 | 0.7868   |
| Pltp          | NM_011125    | 7.25E-05 | 0.658034 |
| Cd209a        | NM_133238    | 7.27E-05 | 0.746365 |

|               |              |             |          |
|---------------|--------------|-------------|----------|
| Nos2          | NM_010927    | 7.36E-05    | 0.629756 |
| 4930578C19Rik | BC118515     | 7.40E-05    | 0.706508 |
| Entpd2        | NM_009849    | 7.44E-05    | 0.710596 |
| C1qtnf1       | NM_019959    | 7.48E-05    | 1.38782  |
| Whsc1l1       | NM_001081269 | 7.52E-05    | 1.15188  |
| Emr1          | NM_010130    | 7.54E-05    | 1.52852  |
| Enc1          | NM_007930    | 7.65E-05    | 1.61831  |
| Ccl11         | NM_011330    | 7.79E-05    | 0.45131  |
| Dse           | NM_172508    | 7.90E-05    | 1.48487  |
| Htr2b         | NM_008311    | 7.92E-05    | 0.57649  |
| Cdgap         | NM_020260    | 7.99E-05    | 1.22372  |
| Ptgs1         | NM_008969    | 8.07E-05    | 1.41244  |
| Mid1          | NM_183151    | 8.10E-05    | 1.18463  |
| Stard13       | NM_146258    | 8.14E-05    | 0.800139 |
| Prps2         | NM_026662    | 8.35E-05    | 0.601949 |
| Ccbp2         | NM_021609    | 8.38E-05    | 1.83028  |
| Dock9         | NM_001081039 | 8.40E-05    | 0.802659 |
| Mme           | NM_008604    | 8.41E-05    | 0.545932 |
| Vcan          | NM_001081249 | 8.44E-05    | 1.5709   |
| Adi1          | NM_134052    | 8.58E-05    | 0.75976  |
| Golim4        | NM_175193    | 8.74E-05    | 1.42956  |
| Igf1r         | NM_010513    | 8.89E-05    | 1.26825  |
| Emb           | NM_010330    | 8.92E-05    | 2.40693  |
| 9030617O03Rik | BC021385     | 8.92E-05    | 0.585412 |
| Fkbp4         | NM_010219    | 9.06E-05    | 0.697202 |
| Tm6sf1        | NM_145375    | 9.19E-05    | 1.34486  |
| Hrasls        | NM_013751    | 9.30E-05    | 0.662503 |
| Spnb2         | NM_009260    | 9.31E-05    | 1.17025  |
| Uchl1         | NM_011670    | 9.36E-05    | 1.63114  |
| Crispld1      | NM_031402    | 9.39E-05    | 1.90137  |
| Fah           | NM_010176    | 9.50E-05    | 0.482825 |
| St3gal4       | NM_009178    | 9.55E-05    | 1.27603  |
| Trim7         | NM_053166    | 9.66E-05    | 0.540592 |
| Clec4d        | NM_010819    | 9.68E-05    | 2.16634  |
| Hspb6         | NM_001012401 | 9.69E-05    | 0.765633 |
| Wt1           | NM_144783    | 9.70E-05    | 1.5755   |
| Pgm2          | NM_028132    | 9.79E-05    | 0.792427 |
| Cecr5         | NM_144815    | 9.92E-05    | 0.829293 |
| Rsad2         | NM_021384    | 0.000100295 | 0.55227  |
| Gna14         | NM_008137    | 0.000101046 | 0.688201 |
| P2ry14        | NM_133200    | 0.000101138 | 0.41171  |
| Rnf122        | NM_175136    | 0.000101977 | 0.788906 |
| Rwdd4a        | NM_203507    | 0.000102819 | 0.751007 |
| P2ry1         | NM_008772    | 0.000102902 | 0.609186 |
| Dapk2         | NM_010019    | 0.000104378 | 1.66371  |
| Inpp4a        | NM_030266    | 0.000104924 | 0.876452 |
| Tox3          | NM_172913    | 0.000105133 | 1.43474  |



|               |              |             |          |
|---------------|--------------|-------------|----------|
| Aldh4a1       | NM_175438    | 0.000105296 | 0.773106 |
| Mrc1          | NM_008625    | 0.000105915 | 0.712494 |
| Popdc2        | NM_001081984 | 0.00010648  | 0.871096 |
| Kmo           | NM_133809    | 0.000107273 | 0.741052 |
| H2-Ab1        | NM_207105    | 0.000107512 | 0.751967 |
| Dhodh         | NM_020046    | 0.000107958 | 0.828005 |
| Atad3a        | NM_179203    | 0.000108114 | 0.817316 |
| Ndufb3        | NM_025597    | 0.000108162 | 0.809835 |
| Igfbp7        | NM_008048    | 0.000109151 | 1.57353  |
| Golga4        | NM_018748    | 0.000110402 | 1.66189  |
| Acads         | NM_007383    | 0.000110647 | 0.712794 |
| Hsd17b10      | NM_016763    | 0.000111475 | 0.751406 |
| Cacna1s       | NM_001081023 | 0.000111493 | 0.687408 |
| Wasf3         | NM_145155    | 0.00011188  | 1.30674  |
| Man1a2        | NM_010763    | 0.000112326 | 1.14179  |
| Itgb1bp2      | NM_013712    | 0.000112374 | 0.752346 |
| Bsg           | NM_009768    | 0.000113004 | 0.821365 |
| Al118078      | BC068128     | 0.000113452 | 0.743434 |
| Sacs          | NM_172809    | 0.000113733 | 0.775894 |
| 10-Sep        | NM_001009818 | 0.000115683 | 1.36176  |
| Peci          | NM_011868    | 0.000115703 | 0.691544 |
| Prkca         | NM_011101    | 0.000115923 | 1.22174  |
| Uqcrfs1       | NM_025710    | 0.000116071 | 0.788462 |
| Pank1         | NM_001114339 | 0.000116844 | 0.818803 |
| Atp6v0a2      | NM_011596    | 0.00011692  | 0.865734 |
| Stk32b        | NM_022416    | 0.000117544 | 1.95884  |
| Spag7         | NM_172561    | 0.000118276 | 0.821696 |
| Clec3b        | NM_011606    | 0.000118645 | 0.465997 |
| Lamb3         | NM_008484    | 0.000118869 | 0.804195 |
| Cnga2         | NM_007724    | 0.000119028 | 1.37427  |
| Kirrel        | NM_130867    | 0.000119196 | 1.26428  |
| Car13         | NM_024495    | 0.000121319 | 1.56013  |
| Cd83          | NM_009856    | 0.000121703 | 0.542447 |
| A330021E22Rik | BC062906     | 0.000124469 | 1.65671  |
| Dctd          | NM_178788    | 0.000124514 | 0.65652  |
| 4933425L03Rik | BC057020     | 0.000125516 | 0.870344 |
| D10Jhu81e     | NM_138601    | 0.000125624 | 0.708538 |
| Adsl          | NM_009634    | 0.000125952 | 0.857505 |
| Hes6          | NM_019479    | 0.000126994 | 0.782373 |
| Abhd1         | NR_003522    | 0.000127987 | 0.599906 |
| Glr5          | NM_028419    | 0.000128507 | 0.802695 |
| Fgl2          | NM_008013    | 0.000128602 | 1.85263  |
| Sfn3          | NM_011409    | 0.000128619 | 0.590574 |
| N28178        | BC057092     | 0.000129704 | 0.683549 |
| Clec14a       | NM_025809    | 0.000129876 | 1.57268  |
| Gsta4         | NM_010357    | 0.000130214 | 0.682805 |
| Cyc1          | NM_025567    | 0.000130459 | 0.865793 |

|               |              |             |          |
|---------------|--------------|-------------|----------|
| Camk2a        | NM_177407    | 0.00013075  | 0.862214 |
| Acadvl        | NM_017366    | 0.000132263 | 0.779165 |
| Prkcq         | NM_008859    | 0.000132461 | 0.609567 |
| Slc25a16      | NM_175194    | 0.000132722 | 0.848164 |
| Ccdc69        | NM_177471    | 0.000135543 | 0.77377  |
| Cdh23         | NM_023370    | 0.000137469 | 0.645802 |
| Btg2          | NM_007570    | 0.000137572 | 1.91204  |
| Lpcat2        | NM_173014    | 0.000138975 | 1.52668  |
| Mmachc        | NM_025962    | 0.000139328 | 0.780902 |
| Edc3          | NM_153799    | 0.00014007  | 1.14614  |
| Rgnef         | NM_012026    | 0.000141825 | 1.32166  |
| Sod3          | NM_011435    | 0.000141976 | 1.52274  |
| BC017612      | NM_133214    | 0.000142112 | 0.565424 |
| D16H22S680E   | BC005445     | 0.000142911 | 0.716693 |
| Ctsf          | NM_019861    | 0.000143951 | 0.831365 |
| Bcat1         | NM_007532    | 0.000145184 | 1.67814  |
| St3gal1       | NM_009177    | 0.000145823 | 1.23226  |
| Mbc2          | NM_011843    | 0.000147836 | 1.19006  |
| Epb4.1l2      | NM_013511    | 0.000148595 | 1.14083  |
| Khdrbs3       | NM_010158    | 0.000149397 | 0.863168 |
| Folr2         | NM_008035    | 0.000149698 | 0.557306 |
| Mtap7d3       | NM_177293    | 0.000149881 | 1.38256  |
| Lepr          | NM_146146    | 0.000150579 | 2.3732   |
| 2600010E01Rik | NM_001110849 | 0.000150641 | 1.43078  |
| Ccbl1         | NM_172404    | 0.000151225 | 0.782907 |
| Arhgap30      | NM_001005508 | 0.000152626 | 1.17027  |
| Mrpl3         | NM_053159    | 0.000152744 | 0.803515 |
| Lrp1          | NM_008512    | 0.000152892 | 1.63817  |
| Ipo9          | NM_153774    | 0.000153063 | 1.15393  |
| Ap1m1         | NM_007456    | 0.000153077 | 0.879107 |
| Lass6         | NM_172856    | 0.000153543 | 1.54081  |
| Slc35f1       | NM_178675    | 0.000153666 | 0.788125 |
| Tmem25        | NM_027865    | 0.000154623 | 0.729308 |
| Ctdspl        | NM_133710    | 0.00015724  | 1.35015  |
| Scin          | NM_009132    | 0.000157584 | 1.5204   |
| Supt6h        | NM_009297    | 0.000157621 | 1.12778  |
| Axin2         | NM_015732    | 0.000159865 | 1.39425  |
| Stat3         | NM_213659    | 0.000160048 | 1.1256   |
| Flad1         | NM_177041    | 0.000162251 | 0.801127 |
| Ntn1          | NM_008744    | 0.00016508  | 1.18676  |
| Sele          | NM_011345    | 0.000165093 | 1.86798  |
| Gtf2h5        | NM_181392    | 0.000165529 | 0.867458 |
| Map3k4        | NM_011948    | 0.000165578 | 0.860373 |
| Ndufa6        | NM_025987    | 0.000165654 | 0.739231 |
| Slain2        | NM_153567    | 0.000166122 | 1.16952  |
| Ipo13         | NM_146152    | 0.000166164 | 0.732969 |
| 4930562D19Rik | NM_177616    | 0.000166672 | 1.12653  |

|               |                    |             |          |
|---------------|--------------------|-------------|----------|
| Hfe2          | NM_027126          | 0.000167316 | 0.722945 |
| Guk1          | NM_008193          | 0.000169215 | 0.81567  |
| A2m           | NM_175628          | 0.000170263 | 1.88955  |
| Mtch2         | NM_019758          | 0.000172502 | 0.865863 |
| D330045A20Rik | BC113128           | 0.000172932 | 1.42421  |
| Ankrd37       | NM_001039562       | 0.000174655 | 1.68968  |
| Psd4          | NM_177611          | 0.000176018 | 1.35405  |
| Rspo2         | NM_172815          | 0.000176267 | 1.63833  |
| Limch1        | NM_001001980       | 0.000177216 | 0.760965 |
| Qdpr          | NM_024236          | 0.000177416 | 0.779562 |
| Ephx2         | NM_007940          | 0.000178159 | 0.674073 |
| Tmtc1         | NM_198967          | 0.000180205 | 1.21392  |
| Mrpl46        | NM_023331          | 0.000181096 | 0.771247 |
| Gabre         | ENSMUST00000114557 | 0.000182147 | 1.47635  |
| Ugdh          | NM_009466          | 0.000182714 | 1.2532   |
| Myo1b         | NM_010863          | 0.000184017 | 0.760198 |
| Slc25a15      | NM_181325          | 0.000185503 | 0.822283 |
| 1110012N22Rik | BC091000           | 0.000186884 | 0.710481 |
| Lrrc17        | NM_028977          | 0.000187064 | 1.52818  |
| 1700020C11Rik | NM_026443          | 0.000187958 | 0.74981  |
| Hspa12a       | NM_175199          | 0.000189857 | 0.846871 |
| BC062109      | BC055321           | 0.000190329 | 0.597762 |
| Kcnn3         | NM_080466          | 0.000191417 | 0.520395 |
| Idh2          | NM_173011          | 0.000192358 | 0.740384 |
| Tmtc2         | NM_177368          | 0.0001935   | 1.72663  |
| Hcn2          | NM_008226          | 0.00019362  | 0.647997 |
| Aebp1         | NM_009636          | 0.000194937 | 1.76562  |
| Cox6b1        | NM_025628          | 0.000195495 | 0.803211 |
| Fgf2          | NM_008006          | 0.000195768 | 1.5022   |
| Echdc3        | NM_024208          | 0.00019582  | 0.715336 |
| Ndufaf2       | NM_001127346       | 0.00019605  | 0.778294 |
| Bnc2          | NM_172870          | 0.000196479 | 0.549001 |
| Extl3         | NM_018788          | 0.000197151 | 1.24545  |
| Nrp2          | NM_001077403       | 0.000198108 | 0.735776 |
| Sox9          | NM_011448          | 0.000199829 | 1.52137  |
| Wwp2          | NM_025830          | 0.000201135 | 1.21065  |
| Angpt2        | NM_007426          | 0.000202634 | 1.33075  |
| Btnl9         | NM_172793          | 0.000204557 | 1.25768  |
| Fzd8          | NM_008058          | 0.000204877 | 0.761832 |
| Sdc3          | NM_011520          | 0.000210615 | 1.167    |
| Adam23        | NM_011780          | 0.000211563 | 1.95459  |
| Hpgd          | NM_008278          | 0.000213213 | 1.84039  |
| Tgfbr1        | NM_009370          | 0.000213978 | 1.36925  |
| Lipt1         | NM_001037918       | 0.000215124 | 0.751774 |
| Sigirr        | NM_023059          | 0.000215409 | 0.773498 |
| D8Ert82e      | NM_172911          | 0.000216788 | 0.726773 |
| Mrpl55        | NM_026035          | 0.00021707  | 0.800628 |

|               |              |             |          |
|---------------|--------------|-------------|----------|
| Tbx18         | NM_023814    | 0.000217251 | 1.33262  |
| Creb1         | NM_133828    | 0.000217697 | 1.35642  |
| Cd53          | NM_007651    | 0.000219153 | 1.2985   |
| Wisp2         | NM_016873    | 0.00021943  | 1.70012  |
| Ndufc2        | NM_024220    | 0.000219754 | 0.73456  |
| Id2           | NM_010496    | 0.000221926 | 2.26283  |
| Ambra1        | NM_172669    | 0.000222613 | 1.12543  |
| Schip1        | NM_001113421 | 0.000222878 | 0.830706 |
| Pdrg1         | NM_178939    | 0.00022348  | 0.830329 |
| Hibadh        | NM_145567    | 0.000223768 | 0.797201 |
| Frzb          | NM_011356    | 0.00022415  | 1.85631  |
| Pknox2        | NM_148950    | 0.000224322 | 1.34416  |
| Mitf          | NM_001113198 | 0.000225315 | 0.712211 |
| Wdfy3         | NM_172882    | 0.000225884 | 1.22567  |
| Cox4i1        | NM_009941    | 0.000226437 | 0.841451 |
| Stk40         | NM_028800    | 0.000227147 | 0.74     |
| Slc1a5        | NM_009201    | 0.000227442 | 1.49348  |
| Fn1           | NM_010233    | 0.000229866 | 1.80703  |
| Caprin1       | NM_016739    | 0.000232643 | 0.904405 |
| Fbp2          | NM_007994    | 0.000232864 | 0.579758 |
| Polg          | NM_017462    | 0.000233741 | 0.909486 |
| Cbx5          | NM_001110216 | 0.000233777 | 1.1672   |
| Grn           | NM_008175    | 0.000234016 | 1.24683  |
| Mcpt2         | NM_008571    | 0.000236215 | 1.65309  |
| Pfkm          | NM_021514    | 0.000237715 | 0.89145  |
| Aldh111       | NM_027406    | 0.000237885 | 0.712423 |
| Oplah         | NM_153122    | 0.00023927  | 0.765226 |
| Rfxap         | NM_133231    | 0.000241025 | 0.866597 |
| Il1r1         | NM_008362    | 0.000242056 | 1.25108  |
| Tmem98        | NM_029537    | 0.000244924 | 1.22037  |
| Susd2         | NM_027890    | 0.000245167 | 1.58962  |
| Elovl1        | NM_019422    | 0.000245718 | 1.23335  |
| Glt8d2        | NM_029102    | 0.000246239 | 1.29241  |
| Cxcl16        | NM_023158    | 0.000246629 | 1.35031  |
| Mxra8         | NM_024263    | 0.000247063 | 1.30399  |
| Olfml2b       | NM_177068    | 0.000248343 | 1.7808   |
| Dusp18        | NM_173745    | 0.000249672 | 0.609176 |
| Sema4a        | NM_013658    | 0.000250023 | 0.716395 |
| 9530058B02Rik | BC024332     | 0.000250026 | 0.761172 |
| Hrasls3       | NM_139269    | 0.000251133 | 0.664561 |
| Sema3c        | NM_013657    | 0.000251776 | 0.583072 |
| Slamf9        | NM_029612    | 0.000255411 | 0.750475 |
| Fbxo16        | NM_015795    | 0.000256307 | 0.75495  |
| Mrpl9         | NM_030116    | 0.000256468 | 0.850913 |
| Ttc7          | NM_028639    | 0.000257252 | 0.710776 |
| Notch3        | NM_008716    | 0.000257534 | 1.33646  |
| Psm6          | NM_008946    | 0.000257873 | 0.815265 |

|               |                    |             |          |
|---------------|--------------------|-------------|----------|
| Mapk10        | NM_009158          | 0.000258196 | 0.788234 |
| Pnck          | NM_012040          | 0.000259936 | 0.696751 |
| Xpnpep2       | NM_133213          | 0.000260599 | 0.617852 |
| Aqp7          | NM_007473          | 0.000263077 | 0.56702  |
| Fcna          | NM_007995          | 0.000263149 | 0.66971  |
| Stom          | NM_013515          | 0.000264238 | 0.723427 |
| Chst10        | NM_145142          | 0.00026531  | 1.18443  |
| Sh3rf1        | NM_021506          | 0.000268443 | 1.10572  |
| 6430550H21Rik | BC062956           | 0.000268732 | 1.35291  |
| Ttc15         | NM_178811          | 0.00026933  | 0.870238 |
| Decr1         | NM_026172          | 0.000270357 | 0.757839 |
| Ssfa2         | NM_080558          | 0.000270692 | 1.16715  |
| Olfm2         | NM_173777          | 0.000271251 | 1.66537  |
| Acadm         | NM_007382          | 0.000271774 | 0.811077 |
| Mrps17        | NM_025450          | 0.000272336 | 0.804619 |
| Afg3l1        | NM_054070          | 0.000272809 | 0.895298 |
| Nts           | NM_024435          | 0.000272865 | 2.4427   |
| Alad          | NM_008525          | 0.000275595 | 0.791242 |
| Lama2         | NM_008481          | 0.00027655  | 1.17725  |
| Epyc          | NM_007884          | 0.000278566 | 2.44486  |
| Ace2          | NM_027286          | 0.000284831 | 0.527782 |
| Myh10         | NM_175260          | 0.000285105 | 1.39903  |
| 0610012G03Rik | BC021536           | 0.000285512 | 0.802391 |
| Itgav         | NM_008402          | 0.000285666 | 1.21276  |
| 6720469N11Rik | BC062651           | 0.000286552 | 1.43023  |
| Esrrb         | NM_011934          | 0.000287946 | 0.60507  |
| Zbtb8b        | NM_153541          | 0.000288415 | 1.47805  |
| Myo10         | NM_019472          | 0.000288964 | 0.71679  |
| Aldh1a3       | NM_053080          | 0.000292192 | 1.64151  |
| Acad11        | NM_175324          | 0.000292375 | 0.654943 |
| Endod1        | NM_028013          | 0.000292521 | 1.17608  |
| Maged2        | ENSMUST00000112700 | 0.000292828 | 1.28852  |
| Dgkd          | BC048957           | 0.000294964 | 0.844947 |
| Cdc2l6        | NM_198164          | 0.000295464 | 1.38424  |
| Dbt           | NM_010022          | 0.00029708  | 0.687743 |
| Ndufs6        | NM_010888          | 0.000297189 | 0.747445 |
| Gatm          | NM_025961          | 0.000299083 | 1.58647  |
| Tcp11l2       | NM_146008          | 0.000299567 | 0.787878 |
| Acaa2         | NM_177470          | 0.000299573 | 0.750778 |
| Siglech       | NM_178706          | 0.000299761 | 0.661441 |
| Thbs3         | NM_013691          | 0.000300866 | 1.26642  |
| S1pr3         | NM_010101          | 0.00030091  | 0.635361 |
| Nckap1l       | NM_153505          | 0.000301127 | 1.34936  |
| Gcgr          | NM_008101          | 0.000302882 | 1.56854  |
| Map3k12       | NM_009582          | 0.000303161 | 1.20068  |
| Slc16a3       | NM_001038653       | 0.000304554 | 1.8525   |
| Slc44a5       | NM_001081263       | 0.000305572 | 0.828647 |

|               |              |             |          |
|---------------|--------------|-------------|----------|
| Sod2          | NM_013671    | 0.000305661 | 0.824236 |
| Smpd2         | NM_009213    | 0.000306311 | 0.70991  |
| Gjc1          | NM_008122    | 0.000307998 | 1.24059  |
| Osmr          | NM_011019    | 0.000308531 | 1.32657  |
| Bckdhb        | NM_199195    | 0.000309759 | 0.676299 |
| Emr4          | NM_139138    | 0.000310118 | 1.44584  |
| Adamts5       | NM_011782    | 0.000310891 | 0.680985 |
| Pcp4          | NM_008791    | 0.000313941 | 0.70888  |
| Galnt3        | NM_015736    | 0.000315387 | 1.32728  |
| Nkd1          | NM_027280    | 0.000316201 | 1.44136  |
| A930038C07Rik | BC047154     | 0.000316794 | 0.657365 |
| Pxmp2         | NM_008993    | 0.000317217 | 0.560281 |
| Hk2           | NM_013820    | 0.00031779  | 0.819478 |
| Baz1b         | NM_011714    | 0.000319437 | 1.10069  |
| Pilra         | NM_153510    | 0.000320091 | 2.24299  |
| Icam1         | NM_010493    | 0.000322533 | 1.21256  |
| Ckmt2         | NM_198415    | 0.000322991 | 0.810775 |
| Slc25a34      | NM_001013780 | 0.000323245 | 0.675045 |
| Tll2          | NM_011904    | 0.000324167 | 0.671692 |
| Tmem100       | NM_026433    | 0.000333517 | 0.785376 |
| Mmp3          | NM_010809    | 0.000334006 | 1.84379  |
| Chd3          | NM_146019    | 0.000334241 | 1.16895  |
| Ltbp4         | NM_175641    | 0.000338975 | 1.38695  |
| Nit2          | NM_023175    | 0.000340163 | 0.81247  |
| Il6st         | NM_010560    | 0.000341825 | 1.14557  |
| Coro2b        | NM_175484    | 0.000343797 | 0.868366 |
| Elmo3         | NM_172760    | 0.000346405 | 1.23339  |
| 6330416G13Rik | BC023748     | 0.000347725 | 0.783485 |
| Satb1         | NM_009122    | 0.000348962 | 1.14991  |
| Mtap7         | NM_008635    | 0.000350474 | 0.867552 |
| Qsox2         | NM_153559    | 0.000351531 | 0.751552 |
| Sema6a        | NM_018744    | 0.000352532 | 0.717778 |
| Ndufa5        | NM_026614    | 0.000356775 | 0.766471 |
| Pnkd          | NM_001039509 | 0.000358377 | 0.759422 |
| Tbrg4         | NM_134011    | 0.000359864 | 0.85967  |
| Pet112l       | NM_144896    | 0.000362094 | 0.799225 |
| Mrpl50        | NM_178603    | 0.000363226 | 0.825817 |
| Atad2         | NM_027435    | 0.000368607 | 1.40109  |
| Pigy          | NM_025574    | 0.0003692   | 0.847516 |
| Stap2         | NM_145934    | 0.000370064 | 0.776148 |
| Luzp2         | NM_178705    | 0.000372227 | 0.797511 |
| 1500005A01Rik | AB054001     | 0.000375129 | 0.721457 |
| Chad          | NM_007689    | 0.000375549 | 1.99285  |
| Ech1          | NM_016772    | 0.000376778 | 0.741401 |
| B230317C12Rik | NM_019833    | 0.000378509 | 0.737583 |
| Dffa          | NM_001025296 | 0.000380335 | 0.81151  |
| Rlbp11l       | NM_028940    | 0.000382111 | 0.664005 |

|               |              |             |          |
|---------------|--------------|-------------|----------|
| Cygb          | NM_030206    | 0.000382755 | 1.23266  |
| Oxct1         | NM_024188    | 0.00038279  | 0.860486 |
| Ccr1          | NM_009912    | 0.000387488 | 0.477001 |
| Higd1b        | NM_080846    | 0.00038772  | 0.778831 |
| Sephs2        | NM_009266    | 0.000388082 | 0.836618 |
| Mrpl47        | NM_029017    | 0.00038835  | 0.769244 |
| Aldh1a2       | NM_009022    | 0.000388675 | 2.17706  |
| Slk           | NM_009289    | 0.000391959 | 1.30298  |
| Ptpns         | NM_011218    | 0.000391961 | 1.1076   |
| H2-Eb1        | NM_010382    | 0.000395115 | 0.738218 |
| Id3           | NM_008321    | 0.000396397 | 1.81507  |
| Slc37a2       | NM_020258    | 0.000397406 | 1.29723  |
| Atp5g3        | NM_175015    | 0.000398886 | 0.833511 |
| Mrps7         | NM_025305    | 0.000399781 | 0.835271 |
| Sh3d19        | NM_001082414 | 0.000403346 | 1.19867  |
| Mertk         | NM_008587    | 0.000405616 | 1.22753  |
| Atp7a         | NM_001109757 | 0.000406573 | 1.29048  |
| Kctd8         | NM_175519    | 0.000411035 | 1.41155  |
| P4ha3         | NM_177161    | 0.000414886 | 1.35313  |
| 4632415K11Rik | BC030874     | 0.000415135 | 0.727228 |
| Prkra         | NM_011871    | 0.00041566  | 0.844494 |
| Acss1         | NM_080575    | 0.000417897 | 0.743328 |
| BC029169      | BC029169     | 0.000420667 | 1.16434  |
| 9630033F20Rik | BC147705     | 0.000421381 | 0.826121 |
| Csnk1d        | NM_027874    | 0.000422709 | 1.16608  |
| Rps6ka1       | NM_009097    | 0.000425539 | 1.18841  |
| Sox17         | NM_011441    | 0.000426262 | 1.4991   |
| Dpep2         | NM_176913    | 0.000426822 | 1.44694  |
| Akap1         | NM_009648    | 0.000429532 | 0.851642 |
| Spryd4        | NM_025716    | 0.000430704 | 0.795662 |
| Acy1          | NM_025371    | 0.000431851 | 0.810905 |
| 2410137M14Rik | BC147446     | 0.000435723 | 0.46986  |
| 2310039E09Rik | NM_026509    | 0.000436978 | 0.790507 |
| Poldip2       | NM_026389    | 0.000439713 | 0.830339 |
| Ppfia2        | NM_177373    | 0.000439715 | 1.39158  |
| Sh3tc2        | NM_172628    | 0.000441036 | 0.851215 |
| Lrrtm3        | NM_178678    | 0.000442894 | 1.3824   |
| Prmt7         | NM_145404    | 0.000443781 | 0.841689 |
| Atp5o         | NM_138597    | 0.000445783 | 0.690287 |
| Pthr1         | NM_011199    | 0.000448475 | 1.37345  |
| Robo1         | NM_019413    | 0.000448631 | 1.38079  |
| Ubl5          | NM_025401    | 0.00044879  | 0.802081 |
| Muc4          | NM_080457    | 0.000449589 | 0.834029 |
| Cdh8          | NM_007667    | 0.000452886 | 1.16916  |
| Alox5         | NM_009662    | 0.000455053 | 0.74173  |
| Mgat4a        | NM_173870    | 0.00046051  | 1.24285  |
| Lcp1          | NM_008879    | 0.000461818 | 1.45528  |

|               |                    |             |          |
|---------------|--------------------|-------------|----------|
| Mib1          | NM_144860          | 0.00046363  | 1.20624  |
| Paqr4         | NM_023824          | 0.000465622 | 0.758855 |
| Syt5          | NM_016908          | 0.000468767 | 1.54637  |
| Stx3          | NM_152220          | 0.000470423 | 1.23743  |
| Mrps25        | NM_025578          | 0.000472879 | 0.796652 |
| Cd274         | NM_021893          | 0.000473743 | 0.47897  |
| 4930455C21Rik | BC002243           | 0.000473998 | 0.853046 |
| Elovl7        | NM_029001          | 0.000474957 | 0.542735 |
| Nlgn2         | NM_198862          | 0.000475922 | 1.2309   |
| Selenbp2      | NM_019414          | 0.000477947 | 0.723458 |
| Mapk14        | NM_011951          | 0.000478245 | 0.806728 |
| 4930519N13Rik | NM_207204          | 0.000480871 | 1.32714  |
| Zfp251        | NM_001007568       | 0.000483802 | 0.862586 |
| Ak3           | NM_021299          | 0.000489124 | 0.787279 |
| Trim54        | NM_021447          | 0.000489807 | 0.738124 |
| Eno2          | NM_013509          | 0.000494122 | 1.52487  |
| Aldob         | NM_144903          | 0.000494578 | 0.438115 |
| Rxrg          | NM_009107          | 0.000495014 | 0.684227 |
| Chchd10       | NM_175329          | 0.00049649  | 0.775254 |
| Pdhb          | NM_024221          | 0.000499878 | 0.767505 |
| AI593442      | NM_178906          | 0.000499958 | 0.449196 |
| Mrpl24        | NM_026591          | 0.000500522 | 0.903762 |
| Rhd           | NM_011270          | 0.000500729 | 0.728584 |
| Efcab5        | NM_176965          | 0.00050298  | 0.789247 |
| Kif21a        | NM_001109040       | 0.000505402 | 0.839917 |
| Slc25a20      | NM_020520          | 0.000506638 | 0.697551 |
| Nav2          | NM_175272          | 0.000507245 | 0.728473 |
| Polrmt        | NM_172551          | 0.000507887 | 0.828066 |
| Rps6kl1       | NM_146244          | 0.000512505 | 0.716762 |
| Rcor1         | NM_198023          | 0.000513217 | 1.10367  |
| Pygb          | NM_153781          | 0.0005175   | 1.11944  |
| Arhgap18      | NM_176837          | 0.000519187 | 0.761436 |
| Pik3ap1       | NM_031376          | 0.000520776 | 1.25782  |
| Naip3         | ENSMUST00000103563 | 0.000525756 | 0.730579 |
| Irf5          | NM_012057          | 0.000527896 | 1.16034  |
| Slc15a2       | NM_021301          | 0.000528978 | 0.533862 |
| Dync1h1       | NM_030238          | 0.000529295 | 1.25315  |
| Slc25a13      | NM_015829          | 0.000529313 | 0.712487 |
| Aifm2         | NM_001039194       | 0.000530233 | 0.837971 |
| Sh2d3c        | NM_013781          | 0.000530622 | 0.80142  |
| Smc1b         | NM_080470          | 0.000531232 | 1.10624  |
| Faim2         | NM_028224          | 0.000534858 | 1.378    |
| Zmiz1         | NM_183208          | 0.000535407 | 1.21805  |
| Smarcd3       | NM_025891          | 0.000536002 | 1.25946  |
| Rgs17         | NM_019958          | 0.000537603 | 1.67942  |
| Mrpl11        | NM_025553          | 0.000539255 | 0.802371 |
| Acad9         | NM_172678          | 0.000539513 | 0.890054 |



|               |              |             |          |
|---------------|--------------|-------------|----------|
| Mpst          | NM_138670    | 0.000540007 | 0.808391 |
| Armcx2        | NM_026139    | 0.000540077 | 1.22876  |
| Mrpl37        | NM_025500    | 0.00054022  | 0.822003 |
| Dlg2          | NM_011807    | 0.000540264 | 1.27088  |
| Dync2h1       | NM_029851    | 0.000540443 | 0.544687 |
| Ptn           | NM_008973    | 0.000540748 | 2.64507  |
| Aof1          | NM_172262    | 0.000540815 | 0.803651 |
| Cbfb          | NM_022309    | 0.000542999 | 1.12555  |
| Cd209d        | NM_130904    | 0.000544635 | 0.592655 |
| Pcyt2         | NM_024229    | 0.000545403 | 0.78572  |
| Itih2         | NM_010582    | 0.000548995 | 2.08582  |
| Tuft1         | NM_011656    | 0.000549697 | 0.579646 |
| Stau1         | NM_001109906 | 0.00055854  | 1.07625  |
| Gstz1         | NM_010363    | 0.000559494 | 0.7715   |
| Cep192        | BC064462     | 0.000562994 | 1.2547   |
| Lgmn          | NM_011175    | 0.000563029 | 1.2141   |
| Lrp6          | NM_008514    | 0.00056356  | 1.16525  |
| 1110007M04Rik | BC028764     | 0.000563804 | 0.757986 |
| St6gal1       | NM_145933    | 0.000565445 | 0.782299 |
| Pmpca         | NM_173180    | 0.000566724 | 0.878571 |
| Mast2         | NM_001042743 | 0.000567359 | 0.914713 |
| Pcnx          | NM_018814    | 0.000567398 | 1.15122  |
| Trip10        | NM_134125    | 0.0005682   | 0.887914 |
| Al836003      | BC090621     | 0.00056984  | 1.43964  |
| Cd72          | NM_001110320 | 0.000570408 | 1.38957  |
| Zfp30         | NM_013705    | 0.00057068  | 0.695997 |
| Slc16a6       | NM_001029842 | 0.000570793 | 0.691996 |
| BC024814      | BC024814     | 0.000571813 | 0.756552 |
| Foxc1         | NM_008592    | 0.000572512 | 1.21186  |
| Gmpr          | NM_025508    | 0.000575891 | 0.806581 |
| Cyp1a1        | NM_009992    | 0.000577989 | 1.70504  |
| 1810009O10Rik | BC027022     | 0.000578532 | 0.786694 |
| Meox2         | NM_008584    | 0.000579407 | 0.726789 |
| BC021891      | NM_145608    | 0.000582577 | 0.830741 |
| Rhot2         | NM_145999    | 0.000583696 | 0.829676 |
| Loxl3         | NM_013586    | 0.000584411 | 1.53758  |
| Kctd9         | NM_001111028 | 0.000584809 | 0.766908 |
| Itih5         | NM_172471    | 0.000587659 | 1.3545   |
| Itgam         | NM_001082960 | 0.00059224  | 1.33862  |
| Sntb2         | NM_009229    | 0.000593042 | 1.20367  |
| Repin1        | NM_001079901 | 0.000593867 | 0.847549 |
| Gsn           | NM_146120    | 0.000594913 | 1.16035  |
| Supv3l1       | NM_181423    | 0.000600955 | 0.795261 |
| Smap2         | NM_133716    | 0.000607155 | 0.82405  |
| Cx3cr1        | BC012653     | 0.00061778  | 1.72267  |
| Cnn2          | NM_007725    | 0.000618386 | 0.760541 |
| Stc1          | NM_009285    | 0.000619031 | 1.95083  |

|               |              |             |          |
|---------------|--------------|-------------|----------|
| Hecw2         | NM_001001883 | 0.000622277 | 1.3429   |
| Dnm3          | NM_001038619 | 0.000623049 | 0.797503 |
| Klhl31        | NM_172925    | 0.000625153 | 0.819618 |
| Galnt1        | NM_001081421 | 0.000625419 | 0.717808 |
| Fcgr4         | NM_144559    | 0.000626677 | 1.64752  |
| Tmem176b      | NM_023056    | 0.000627536 | 1.32529  |
| Pptc7         | NM_177242    | 0.000629917 | 0.805304 |
| Adar          | NM_001038587 | 0.000632359 | 0.861217 |
| Slc43a3       | NM_021398    | 0.000636463 | 1.33278  |
| Cpz           | NM_153107    | 0.000637131 | 1.44384  |
| Bri3bp        | NM_029752    | 0.000638147 | 0.784906 |
| Pi15          | NM_053191    | 0.000641851 | 2.04589  |
| Acp2          | NM_007387    | 0.000641894 | 1.15119  |
| Selenbp1      | NM_009150    | 0.000643447 | 0.618201 |
| Klhdc8b       | NM_030075    | 0.00065118  | 1.22267  |
| 1110018M03Rik | BC027250     | 0.000653801 | 0.552816 |
| Eef1e1        | NM_025380    | 0.00065489  | 0.820098 |
| Plxdc1        | NM_028199    | 0.000658672 | 0.806375 |
| Usp47         | NM_133758    | 0.000659361 | 1.26389  |
| X99384        | NM_013753    | 0.000664685 | 0.794862 |
| 2310014G06Rik | NM_001082975 | 0.000665101 | 0.79207  |
| Hisppd2a      | NM_178795    | 0.000666045 | 0.724783 |
| Nola2         | NM_026631    | 0.000666133 | 0.849462 |
| Epb4.1l1      | NM_013510    | 0.000666832 | 1.14293  |
| Galnt12       | NM_030166    | 0.000667748 | 1.55916  |
| BC106179      | BC106179     | 0.000668602 | 0.765829 |
| Prep          | NM_011156    | 0.000671853 | 0.79663  |
| Alkbh7        | NM_025538    | 0.000672107 | 0.767992 |
| Olf1197       | NM_001005225 | 0.000674087 | 2.04652  |
| Smc1a         | NM_019710    | 0.000676321 | 1.20242  |
| Mdh2          | NM_008617    | 0.0006778   | 0.890591 |
| Il16          | NM_010551    | 0.000679422 | 0.763166 |
| AU040320      | NM_133886    | 0.000680129 | 0.859698 |
| Abcb10        | NM_019552    | 0.000681976 | 0.785138 |
| 4930452B06Rik | BC064468     | 0.000686159 | 0.655489 |
| Ccdc68        | NM_201362    | 0.000693339 | 1.92509  |
| 2310002L09Rik | BC115483     | 0.000695341 | 0.741738 |
| Adk           | NM_134079    | 0.000696026 | 0.741396 |
| Mpi           | NM_025837    | 0.000696707 | 0.745284 |
| Zfp385b       | NM_178723    | 0.000697671 | 1.2444   |
| Mfsd4         | NM_172510    | 0.000697786 | 0.596101 |
| Arrb2         | NM_145429    | 0.00070028  | 1.22865  |
| Eepd1         | NM_026189    | 0.000703146 | 0.615485 |
| Phlda1        | NM_009344    | 0.000708727 | 0.589666 |
| Ccl8          | NM_021443    | 0.000709652 | 0.539296 |
| Gdf10         | NM_145741    | 0.000712322 | 1.48434  |
| Ostm1         | NM_172416    | 0.00071488  | 0.782526 |

|               |                    |             |          |
|---------------|--------------------|-------------|----------|
| Krt222        | BC079890           | 0.000715059 | 0.673178 |
| Gpr65         | NM_008152          | 0.000716856 | 1.78421  |
| Ndufa11       | BC059729           | 0.000721255 | 0.742537 |
| Ptplad2       | NM_025760          | 0.000726594 | 0.786936 |
| Cadm1         | NM_207675          | 0.000728038 | 1.16859  |
| Blnk          | NM_008528          | 0.000731626 | 0.788601 |
| Ano6          | NM_175344          | 0.000732376 | 1.15562  |
| 4632411B12Rik | BC132293           | 0.000734964 | 1.12585  |
| Taz           | NM_181516          | 0.000737309 | 0.882696 |
| Lrrc48        | NM_029044          | 0.000741475 | 0.813944 |
| Htra1         | NM_019564          | 0.000741819 | 0.762321 |
| Sipa1         | NM_011379          | 0.000742474 | 0.833789 |
| Tpbg          | NM_011627          | 0.000747    | 1.31866  |
| Oxad1         | NM_145460          | 0.00074736  | 0.811837 |
| Ddr1          | NM_007584          | 0.000750136 | 1.41197  |
| Slc41a1       | NM_173865          | 0.000759761 | 0.717083 |
| Parp14        | NM_001039530       | 0.000760029 | 0.819408 |
| Ptk2b         | NM_172498          | 0.000761935 | 1.22688  |
| Hsd1l         | NM_175185          | 0.00076462  | 0.870265 |
| Calhm2        | ENSMUST00000035822 | 0.000768283 | 1.38724  |
| Adarb1        | NR_004429          | 0.000770657 | 1.12786  |
| Lgals9        | NM_010708          | 0.00077217  | 0.757566 |
| Cux1          | NM_009986          | 0.000773874 | 1.21705  |
| Ceacam12      | NM_026087          | 0.000778014 | 1.17143  |
| Frem1         | NM_177863          | 0.000781277 | 2.18158  |
| 2310001A20Rik | BC055706           | 0.000782539 | 0.823548 |
| Fhod3         | NM_175276          | 0.000787207 | 0.778623 |
| Mgmt          | NM_008598          | 0.000790694 | 0.721403 |
| Ddit4l        | NM_030143          | 0.000791744 | 0.646944 |
| Pdhx          | NM_175094          | 0.000795055 | 0.728845 |
| Mrpl19        | NM_026490          | 0.00079521  | 0.862631 |
| 1500015O10Rik | NM_024283          | 0.00079746  | 1.55746  |
| Pld1          | NM_008875          | 0.000797753 | 1.18966  |
| Rtn4r         | NM_022982          | 0.000799876 | 0.491975 |
| Glrx          | NM_053108          | 0.000800497 | 0.737485 |
| Clec7a        | NM_020008          | 0.000804769 | 1.43167  |
| 6430706D22Rik | BC057309           | 0.000807532 | 1.23475  |
| 4432416J03Rik | NM_030069          | 0.000809638 | 0.667333 |
| Pvrl3         | NM_021496          | 0.000812693 | 1.10509  |
| Ptx3          | NM_008987          | 0.000814849 | 1.64503  |
| BC020535      | BC020535           | 0.000816143 | 0.831476 |
| Slc38a5       | NM_172479          | 0.000817897 | 1.38565  |
| Pex19         | NM_023041          | 0.000818436 | 0.808595 |
| Tusc2         | NM_019742          | 0.000818445 | 0.853985 |
| Fzd7          | NM_008057          | 0.000820276 | 1.38106  |
| Slc15a4       | NM_133895          | 0.000820705 | 1.11376  |
| Tppp3         | NM_026481          | 0.000825778 | 0.774432 |

|               |              |             |          |
|---------------|--------------|-------------|----------|
| Ly86          | NM_010745    | 0.000826509 | 1.50671  |
| Tgtp          | NM_011579    | 0.000830593 | 0.608611 |
| Gyk           | NM_212444    | 0.000831867 | 0.696852 |
| Fxyd5         | NM_008761    | 0.000832057 | 1.46224  |
| Slc43a1       | NM_001081349 | 0.000832472 | 0.827321 |
| Thbs4         | NM_011582    | 0.000836951 | 0.795313 |
| Wars          | NM_011710    | 0.000839217 | 0.862924 |
| Doc2g         | NM_021791    | 0.000849734 | 0.744465 |
| Sidt1         | NM_198034    | 0.00085058  | 0.746958 |
| Pkia          | NM_008862    | 0.000852465 | 0.74894  |
| Dll1          | NM_007865    | 0.000855772 | 0.710084 |
| Rom1          | NM_009073    | 0.000855818 | 0.684806 |
| Pgf           | NM_008827    | 0.000855933 | 0.65173  |
| Meox1         | NM_010791    | 0.000856113 | 1.68933  |
| Ramp2         | NM_019444    | 0.00085753  | 1.11052  |
| Olfr1170      | NM_146532    | 0.000859341 | 1.29142  |
| Ep400         | NM_029337    | 0.000860531 | 1.0934   |
| Mfap2         | NM_008546    | 0.000860595 | 1.35921  |
| Nmnat1        | NM_133435    | 0.000861036 | 0.755864 |
| Gpr37l1       | NM_134438    | 0.000863931 | 0.692762 |
| Sult1a1       | NM_133670    | 0.000864558 | 0.627313 |
| Lysmd4        | NM_175215    | 0.000867802 | 0.746023 |
| Dgkg          | NM_138650    | 0.000868891 | 1.33526  |
| Hdac11        | NM_144919    | 0.000873845 | 0.789433 |
| Gsta3         | NM_001077353 | 0.000874921 | 0.780923 |
| Camkk2        | NM_145358    | 0.000878051 | 1.28041  |
| Ano4          | NM_178773    | 0.000882153 | 0.740076 |
| 9130005N14Rik | NM_026667    | 0.000882963 | 1.21184  |
| Tep1          | NM_009351    | 0.000884524 | 1.10128  |
| D930015E06Rik | BC062940     | 0.000886336 | 0.826074 |
| Spats2        | NM_139140    | 0.000886457 | 1.20196  |
| Ppbp          | NM_023785    | 0.000894501 | 0.583445 |
| Palm2         | NM_172868    | 0.000900924 | 1.28203  |
| Fgfr1op       | NM_201230    | 0.000902372 | 0.769077 |
| Rgs4          | NM_009062    | 0.000902746 | 0.731588 |
| Sdhb          | NM_023374    | 0.000905335 | 0.754846 |
| Ncald         | NM_134094    | 0.000908714 | 0.827758 |
| Rai12         | NM_018740    | 0.000909342 | 0.858534 |
| Klh4          | NM_172781    | 0.000913771 | 0.680214 |
| 1810014F10Rik | NM_026928    | 0.000916844 | 0.87952  |
| Mmp23         | NM_011985    | 0.000933541 | 1.37445  |
| Dlst          | NM_030225    | 0.000933982 | 0.876364 |
| Gramd1a       | NM_027898    | 0.000935952 | 0.878924 |
| Akap12        | NM_031185    | 0.00094044  | 1.29438  |
| Them2         | NM_025790    | 0.000945951 | 0.779546 |
| Fastkd2       | NM_172422    | 0.000946876 | 0.78362  |
| BC064033      | BC064033     | 0.000952329 | 1.84172  |

|               |           |             |          |
|---------------|-----------|-------------|----------|
| 6330503K22Rik | NM_182995 | 0.000954487 | 1.2168   |
| Klra2         | NM_008462 | 0.000964977 | 1.47333  |
| Pde10a        | NM_011866 | 0.0009653   | 0.817786 |
| Drp2          | NM_010078 | 0.000966303 | 1.30062  |
| Arntl2        | NM_172309 | 0.000967952 | 1.26485  |
| Aco1          | NM_007386 | 0.000972193 | 0.900272 |
| Echs1         | NM_053119 | 0.000974155 | 0.784718 |
| Ndufb8        | NM_026061 | 0.000975941 | 0.75751  |
| M6prbp1       | NM_025836 | 0.000976442 | 0.801926 |
| Pepd          | NM_008820 | 0.000977761 | 0.870061 |
| Gse1          | NM_198671 | 0.000978035 | 1.27189  |
| Relt          | NM_177073 | 0.000978734 | 0.714786 |
| Ston2         | NM_175367 | 0.00098088  | 0.708452 |
| Chek2         | NM_016681 | 0.000982652 | 0.669124 |
| Zdhhc14       | NM_146073 | 0.000984293 | 0.81466  |
| Acy3          | NM_027857 | 0.000990721 | 0.671773 |
